# Supplementary material for: Guideline-directed therapy at discharge in patients with heart failure and atrial fibrillation
Source: PubMed Central journal article supplement — Heart. 2019 Sep 6;106(4):292–8. doi: 10.1136/heartjnl-2019-315240 (PMC7027027; doi:10.1136/heartjnl-2019-315240), 2019-09-06
Supplement: heartjnl-2019-315240supp001.pdf [file heartjnl-2019-315240supp001.pdf]

**Supplementary Table.** Competing risk regression

|                                        | Hazard ratios (95% CI) | p-value |
|----------------------------------------|------------------------|---------|
| 60-day heart failure rehospitalization |                        |         |
| Poor vs. Moderate                      | 1.17 (0.69-1.99)       | 0.567   |
| Poor vs. Good                          | 1.59 (0.77-3.30)       | 0.213   |
| 1-year heart failure rehospitalization |                        |         |
| Poor vs. Moderate                      | 0.92 (0.61-1.40)       | 0.696   |
| Poor vs. Good                          | 1.07 (0.64-1.79)       | 0.790   |

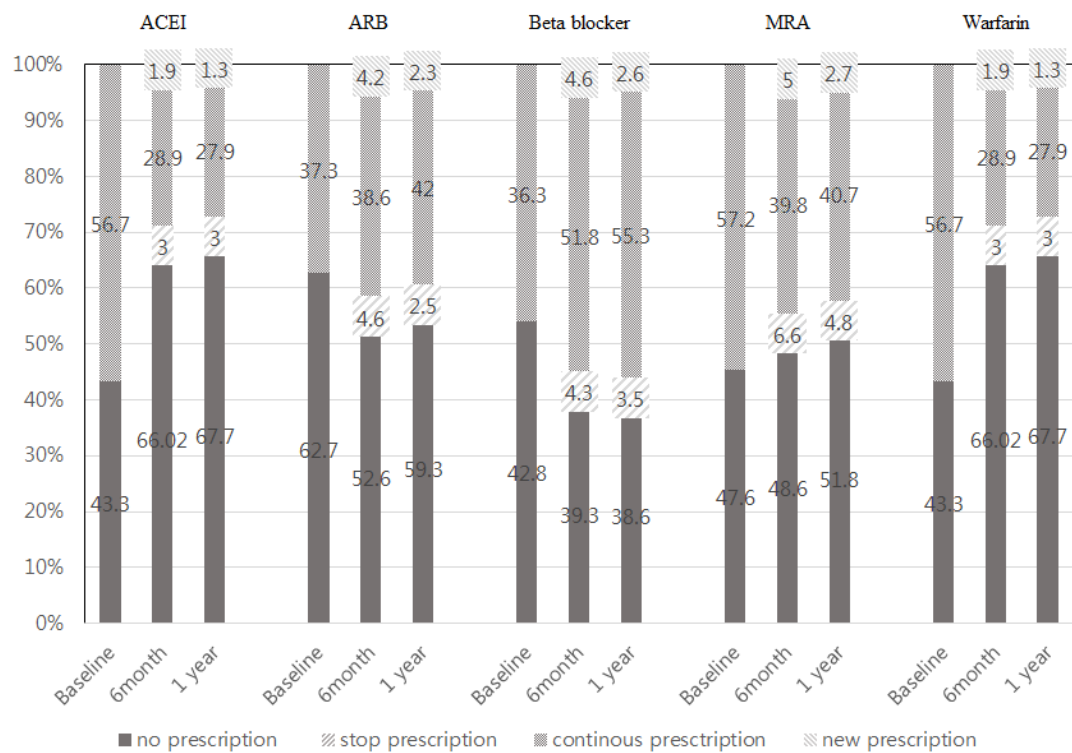**Supplementary Figure.** Change rate of each guideline-directed therapy during follow up.
